# Supplementary material for: ChatGPT Performance in a questionnaire on rheumatological diseases: A Comparison with Specialist’s Opinion
Source: Research Square preprint supplement (doi:10.21203/rs.3.rs-6484816/v1), 2025-05-14
Supplement: Supplementary file 1 [file 4b8684c45285d94fe404a875.pdf]

# ChatGPT Performance in a questionnaire on rheumatological diseases: A Comparison with Specialist's Opinion

## Supplementary 2

Results obtained from blind evaluation by rheumatologists for each answer collected. [\*] indicates that a third evaluator was necessary.

|       | CHATGPT4.0 | 5- (x) | 5- (y) | 5 to 10 (x) | 5 to 10 (y) | 11 to 20 (x) | 11 to 20(y) | 21 to 30 (x) | 21 to 30 (y) |
|-------|------------|--------|--------|-------------|-------------|--------------|-------------|--------------|--------------|
| SLE 1 | 1          | 1      | 1*     | 0           | 1           | 0            | 1           | 0*           | 0            |
| SLE 2 | 0*         | 1*     | 0      | 1           | 1*          | 0            | 1*          | 1*           | 1            |
| SLE 3 | 1*         | 1*     | 1*     | 1*          | 0           | 1*           | 1*          | 1*           | 1*           |
| SLE 4 | 1          | 0      | 1      | 1           | 0           | 0            | 0           | 0            | 0            |
| SLE 5 | 1          | 1      | 1      | 1           | 1           | 1            | 1           | 1            | 1            |
| RA 1  | 0          | 0      | 0      | 1*          | 1           | 0            | 1*          | 1            | 1*           |
| RA 2  | 1          | 0      | 1*     | 0           | 0           | 0*           | 0           | 1            | 0*           |
| RA 3  | 1          | 0      | 1      | 0           | 0           | 0            | 0           | 1            | 0            |
| RA 4  | 0          | 1      | 1      | 1           | 1           | 1            | 1           | 1            | 1            |
| RA 5  | 1          | 1      | 1      | 1           | 1           | 1            | 1           | 1            | 1            |
| AS 1  | 0*         | 1      | 1      | 1           | 1           | 1*           | 1           | 1            | 1            |
| AS 2  | 1          | 0      | 0*     | 1*          | 1*          | 0*           | 0*          | 0*           | 0            |
| AS 3  | 1*         | 1      | 1*     | 1           | 1           | 1*           | 1           | 1            | 1            |
| AS 4  | 0*         | 0*     | 0*     | 0*          | 0*          | 0*           | 0*          | 0*           | 0*           |
| AS 5  | 1          | 1      | 1      | 0           | 1           | 1            | 1           | 1            | 0            |
| PsA 1 | 0          | 1      | 1      | 1           | 1           | 0            | 1           | 1            | 0*           |
| PsA 2 | 1*         | 1*     | 0*     | 0           | 1*          | 0            | 1*          | 1*           | 0*           |
| PsA 3 | 1*         | 0*     | 1*     | 1*          | 0           | 0*           | 0*          | 0            | 0*           |
| PsA 4 | 0          | 0      | 0      | 1           | 1           | 1            | 0           | 0            | 0            |
| PsA 5 | 1          | 1      | 1      | 0           | 1           | 1            | 1           | 0            | 1            |
| FM 1  | 1          | 1      | 1      | 1*          | 1           | 1            | 1           | 1            | 1            |
| FM 2  | 0*         | 0      | 0      | 1           | 1           | 1*           | 1           | 0*           | 0*           |
| FM 3  | 1          | 1      | 1      | 1           | 1           | 1            | 1           | 1            | 1            |
| FM 4  | 1          | 1      | 1      | 1           | 0           | 1            | 1           | 1            | 1            |
| FM 5  | 1          | 1      | 0*     | 0*          | 1*          | 0*           | 0*          | 1            | 0*           |
| TOTAL | 17         | 16     | 17     | 17          | 18          | 13           | 17          | 17           | 12           |

\*SLE= Systemic lupus erythematosus; RA= Rheumatoid Arthritis; AS= Ankylosing spondylitis; PsA= Psoriatic arthritis; FM= Fibromyalgia; \*20+= Rheumatologists with 21 to 30 years of experience (GroupD); 11 a 20= Rheumatologists with 11 to 20 years of experience(Group C); 5 a 10= Rheumatologists with 5 to 10 years of experience (Group B); 5-=Rheumatologists with less than 5 years of experience (Group A).

(1) = 2 evaluators agreed with that answer

(0)= 2 evaluators disagreed with that answer

Question 1: "Name which sign or symptom is most useful in diagnosing (SLE, RA, AS, PsA, FM) in clinical practice."

Question 2: "Name the two diagnoses that most closely mimic (SLE, RA, AS, PsA, FM)."

Question 3: "Name the radiological examination that best contributes to the diagnosis of (SLE, RA, AS, PsA, FM)."

Question 4: "Name which laboratory test have the greatest specificity for diagnosis (SLE, RA, AS, PsA, FM)."

Question 5: "Name the first pharmacological therapeutic option for (SLE, RA, AS, PsA, FM)."

(x) and (y) = indicate each specialist from the groups

**\* indicates that a third evaluator was necessary**
