# Supplementary material for: ChatGPT Performance in a questionnaire on rheumatological diseases: A Comparison with Specialist’s Opinion
Source: Research Square preprint supplement (doi:10.21203/rs.3.rs-6484816/v1), 2025-05-14
Supplement: Supplementary file 2 [file dd98bfd3d01ad88a04f3481a.pdf]

# ChatGPT Performance in a questionnaire on rheumatological diseases: A Comparison with Specialist's Opinion

## Supplementary 1

Screenshots of all answers collected from ChatGPT 4.0 in April 2024

All questions were posed to ChatGPT 4.0 in April 2024, and the answers given were collected. The study was conducted entirely in Brazilian Portuguese. A new account was created solely to collect the answers.

### ***Questions about Systemic lupus erythematosus:***

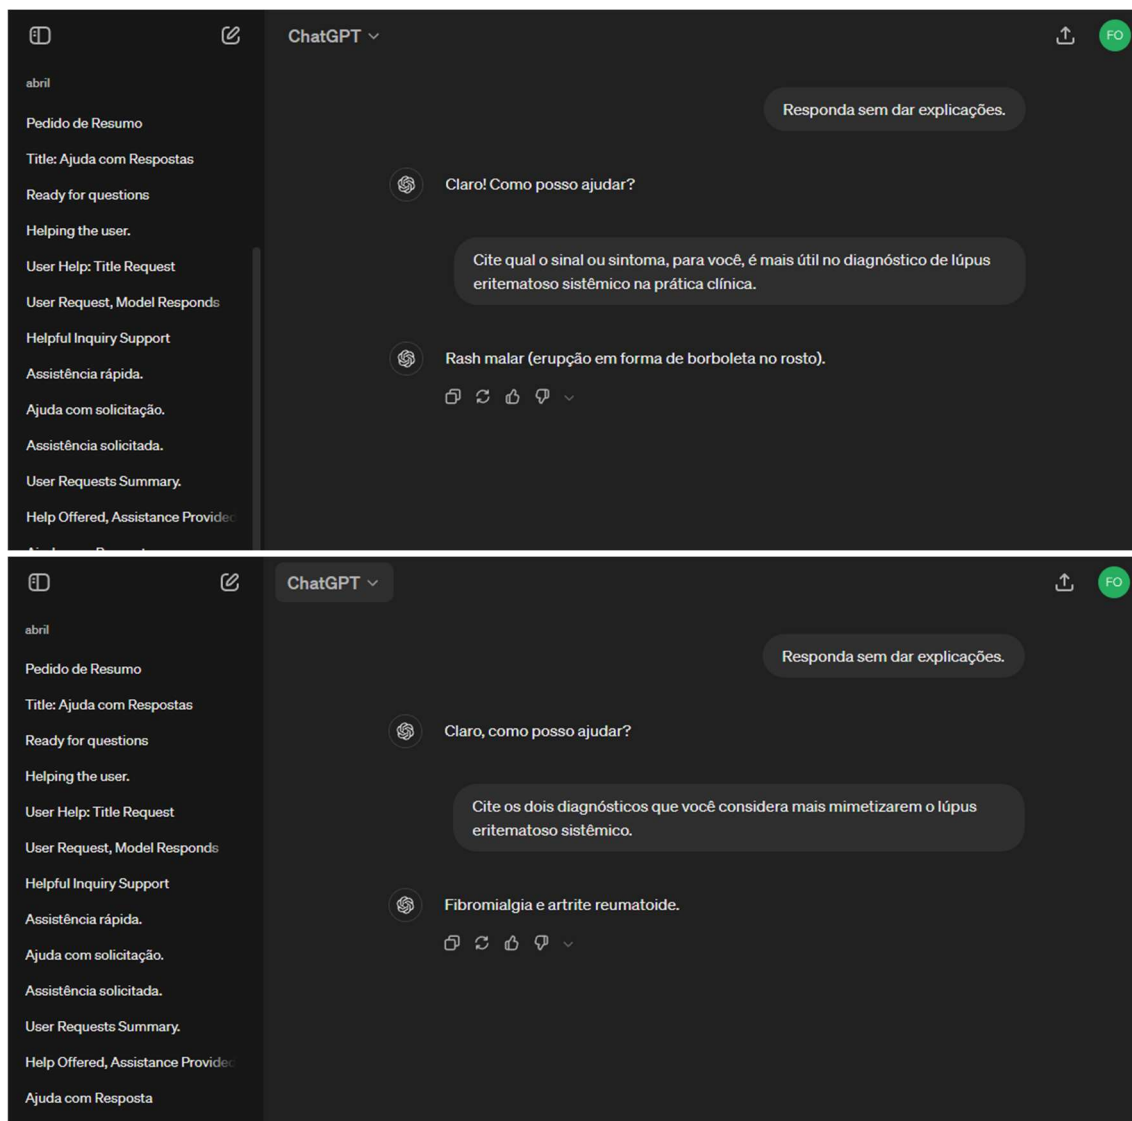

abril

Pedido de Resumo

Title: Ajuda com Respostas

Ready for questions

Helping the user.

User Help: Title Request

User Request, Model Response

Helpful Inquiry Support

Assistência rápida.

Ajuda com solicitação.

Assistência solicitada.

User Requests Summary.

Help Offered, Assistance Provided

Ajuda com Resposta

Title: Request Summary Clarification

ChatGPT

Responda sem dar explicações.

Claro! Como posso ajudar você hoje?

Cite, se houver, o exame radiológico que você julga melhor contribuir para o diagnóstico de lúpus eritematoso sistêmico.

Radiografia de tórax.

abril

Pedido de Resumo

Title: Ajuda com Respostas

Ready for questions

Helping the user.

User Help: Title Request

User Request, Model Response

Helpful Inquiry Support

Assistência rápida.

Ajuda com solicitação.

Assistência solicitada.

User Requests Summary.

Help Offered, Assistance Provided

Ajuda com Resposta

Title: Request Summary Clarification

Title: Summarize above conversation

Como Ajudar?

ChatGPT

Responda sem dar explicações.

Claro, pode perguntar!

Qual o exame laboratorial você considera ter maior especificidade para o diagnóstico de lúpus eritematoso sistêmico?

Anticorpos anti-Sm (Smith).

abril

Pedido de Resumo

Title: Ajuda com Respostas

Ready for questions

Helping the user.

User Help: Title Request

User Request, Model Response

Helpful Inquiry Support

Assistência rápida.

Ajuda com solicitação.

Assistência solicitada.

User Requests Summary.

Help Offered, Assistance Provided

Ajuda com Resposta

ChatGPT

Responda sem dar explicações.

Claro! Como posso ajudar?

Considerando o tratamento farmacológico, cite sua primeira opção terapêutica para o lúpus eritematoso sistêmico.

Hidroxicloroquina.

2

## Questions about Rheumatoid arthritis

The image displays three sequential screenshots of a ChatGPT chat interface, all in Portuguese. Each screenshot shows a sidebar on the left with navigation links and a main chat area on the right. The chat area contains a header with 'ChatGPT' and a dropdown arrow, and a status bar at the bottom with 'abril' and a 'FO' button. The main chat area also features a 'Responda sem dar explicações.' button.

**Screenshot 1:**

- Navigation links: Pedido de Resumo, Title: Ajuda com Respostas, Ready for questions, Helping the user., User Help: Title Request, User Request, Model Responds, Helpful Inquiry Support, Assistência rápida., Ajuda com solicitação., Assistência solicitada., User Requests Summary., Help Offered, Assistance Provided.
- Chat messages:
  - Assistant: Claro, como posso ajudar?
  - User: Cite qual o sinal ou sintoma, para você, é mais útil no diagnóstico da artrite reumatoide na prática clínica.
  - Assistant: Rigidez matinal das articulações.

**Screenshot 2:**

- Navigation links: Pedido de Resumo, Title: Ajuda com Respostas, Ready for questions, Helping the user., User Help: Title Request, User Request, Model Responds, Helpful Inquiry Support, Assistência rápida., Ajuda com solicitação., Assistência solicitada., User Requests Summary., Help Offered, Assistance Provided, Ajuda com Resposta, Title: Request Summary Clarification.
- Chat messages:
  - Assistant: Claro, posso fazer isso. Sobre o que você gostaria de perguntar?
  - User: Cite os dois diagnósticos que você considera mais mimetizarem a artrite reumatoide.
  - Assistant: Lúpus eritematoso sistêmico e artrite psoriásica.

**Screenshot 3:**

- Navigation links: Pedido de Resumo, Title: Ajuda com Respostas, Ready for questions, Helping the user., User Help: Title Request, User Request, Model Responds, Helpful Inquiry Support, Assistência rápida., Ajuda com solicitação., Assistência solicitada., User Requests Summary., Help Offered, Assistance Provided, Ajuda com Resposta, Title: Request Summary Clarification.
- Chat messages:
  - Assistant: Claro! Como posso ajudar?
  - User: Cite, se houver, o exame radiológico que você julga melhor contribuir para o diagnóstico da artrite reumatoide.
  - Assistant: Ressonância magnética (RM).

abril

Pedido de Resumo

Title: Ajuda com Respostas

Ready for questions

Helping the user.

User Help: Title Request

User Request, Model Response

Helpful Inquiry Support

Assistência rápida.

Ajuda com solicitação.

Assistência solicitada.

User Requests Summary.

Help Offered, Assistance Provided

Ajuda com Resposta

Title: Request Summary Clarification

ChatGPT

Responda sem dar explicações.

Claro, posso ajudar com isso! Qual é a sua pergunta?

Qual o exame laboratorial você considera ter maior especificidade para o diagnóstico da artrite reumatoide?

Fator reumatoide e anti-CCP (peptídeos cíclicos citrulinados).

abril

Pedido de Resumo

Title: Ajuda com Respostas

Ready for questions

Helping the user.

User Help: Title Request

User Request, Model Response

Helpful Inquiry Support

Assistência rápida.

Ajuda com solicitação.

Assistência solicitada.

User Requests Summary.

Help Offered, Assistance Provided

Ajuda com Resposta

Title: Request Summary Clarification

ChatGPT

Responda sem dar explicações.

Claro! Como posso ajudar?

Considerando o tratamento farmacológico, cite sua primeira opção terapêutica para a artrite reumatoide.

Metotrexato.

## Questions about Ankylosing spondylitis

abril

Pedido de Resumo

Title: Ajuda com Respostas

Ready for questions

Helping the user.

User Help: Title Request

User Request, Model Responds

Helpful Inquiry Support

Assistência rápida.

Ajuda com solicitação.

Assistência solicitada.

User Requests Summary. ...

Help Offered, Assistance Provided

Ajuda com Resposta

Title: Request Summary Clarification

ChatGPT

Responda sem dar explicações.

Claro, pode perguntar!

Cite qual o sinal ou sintoma, para você, é mais útil no diagnóstico da espondilite anquilosante na prática clínica.

Dor lombar de início insidioso.

abril

Pedido de Resumo

Title: Ajuda com Respostas

Ready for questions

Helping the user.

User Help: Title Request

User Request, Model Responds

Helpful Inquiry Support

Assistência rápida.

Ajuda com solicitação.

Assistência solicitada. ...

User Requests Summary.

Help Offered, Assistance Provided

Ajuda com Resposta

ChatGPT

Responda sem dar explicações.

Claro! Em que posso ajudar?

Cite os dois diagnósticos que você considera mais mimetizarem a espondilite anquilosante.

1. Artrite psoriásica
2. Artrite reativa (Síndrome de Reiter)

abril

Pedido de Resumo

Title: Ajuda com Respostas

Ready for questions

Helping the user.

User Help: Title Request

User Request, Model Responds

Helpful Inquiry Support

Assistência rápida.

Ajuda com solicitação. ...

Assistência solicitada.

User Requests Summary.

Help Offered, Assistance Provided

Ajuda com Resposta

Title: Request Summary Clarification

Title: Summarize above conversation

Como Ajudar?

ChatGPT

Responda sem dar explicações.

Claro, como posso ajudar?

Cite, se houver, o exame radiológico que você julga melhor contribuir para o diagnóstico da espondilite anquilosante.

Ressonância magnética.

abril

Pedido de Resumo

Title: Ajuda com Respostas

Ready for questions

Helping the user.

User Help: Title Request

User Request, Model Response

Helpful Inquiry Support

Assistência rápida. ...

Ajuda com solicitação.

Assistência solicitada.

User Requests Summary.

Help Offered, Assistance Provided

Ajuda com Resposta

Title: Request Summary Clarification

Title: Summarize above conversation

ChatGPT

Responda sem dar explicações.

Claro! Em que posso ajudar?

Qual o exame laboratorial você considera ter maior especificidade para o diagnóstico da espondilite anquilosante?

HLA-B27.

abril

Pedido de Resumo

Title: Ajuda com Respostas

Ready for questions

Helping the user.

User Help: Title Request

User Request, Model Response

Helpful Inquiry Support

Assistência rápida. ...

Ajuda com solicitação.

Assistência solicitada.

User Requests Summary.

Help Offered, Assistance Provided

Ajuda com Resposta

Title: Request Summary Clarification

Title: Summarize above conversation

ChatGPT

Responda sem dar explicações.

Claro! Como posso ajudar?

Considerando o tratamento farmacológico, cite sua primeira opção terapêutica para a espondilite anquilosante.

Anti-inflamatórios não esteroides (AINEs).

Esta conversa foi útil até agora?

## Questions about Psoriatic arthritis

ChatGPT

Explorar GPTs

abril

User Question Answered

Assistência à solicitação.

User question, model response.

User Request: Summarize Conversation

Pedido de Resumo

Title: Ajuda com Respostas

Ready for questions

Helping the user.

User Help: Title Request

User Request, Model Response

Helpful Inquiry Support

Assistência rápida.

Ajuda com solicitação.

Assistência solicitada.

ChatGPT

Responda sem dar explicações.

Claro, como posso ajudar?

Cite qual o sinal ou sintoma, para você, é mais útil no diagnóstico da artrite psoriásica na prática clínica.

Dor nas articulações associada a inchaço e rigidez matinal.

Esta conversa foi útil até agora?

ChatGPT

Explorar GPTs

abril

User Question Answered

Assistência à solicitação.

User question, model response.

User Request: Summarize Conversation

Pedido de Resumo

Title: Ajuda com Respostas

Ready for questions

Helping the user.

User Help: Title Request

User Request, Model Response

Helpful Inquiry Support

Assistência rápida.

ChatGPT

Responda sem dar explicações.

Claro! Como posso ajudar você hoje?

Cite os dois diagnósticos que você considera mais mimetizarem a artrite psoriásica.

Espondilite anquilosante e artrite reumatoide.

ChatGPT

Explorar GPTs

abril

User Question Answered

Assistência à solicitação.

User question, model response.

User Request: Summarize Conversation

Pedido de Resumo

Title: Ajuda com Respostas

Ready for questions

Helping the user.

User Help: Title Request

User Request, Model Response

Helpful Inquiry Support

Assistência rápida.

Ajuda com solicitação.

ChatGPT

Responda sem dar explicações.

Claro! Como posso ajudar você?

Cite, se houver, o exame radiológico que você julga melhor contribuir para o diagnóstico da artrite psoriásica.

Ressonância magnética (MRI).



ChatGPT

Explorar GPTs

abril

User Question Answered

Assistência à solicitação.

User question, model response.

User Request: Summarize Conversation

Pedido de Resumo

Title: Ajuda com Respostas

Ready for questions

Helping the user.

User Help: Title Request

User Request, Model Responds

Helpful Inquiry Support

Assistência rápida.

ChatGPT

Responda sem dar explicações.

Claro, estou pronto para as suas perguntas!

Qual o exame laboratorial você considera ter maior especificidade para o diagnóstico da artrite psoriásica?

O HLA-B27.

ChatGPT

Explorar GPTs

abril

User Question Answered

Assistência à solicitação.

User question, model response.

User Request: Summarize Conversation

Pedido de Resumo

Title: Ajuda com Respostas

Ready for questions

Helping the user.

User Help: Title Request

User Request, Model Responds

Helpful Inquiry Support

Assistência rápida.

ChatGPT

Responda sem dar explicações.

Claro! Como posso ajudá-lo hoje?

Considerando o tratamento farmacológico, cite sua primeira opção terapêutica para a artrite psoriásica.

Metotrexato.



## Questions about Fibromyalgia

The image displays three sequential screenshots of a ChatGPT interface, showing a conversation about fibromyalgia. The interface is in dark mode. On the left is a sidebar with a list of conversation titles, including 'ChatGPT', 'Explorar GPTs', and several specific prompts like 'abril', 'User Question Answered', and 'Assistência à solicitação.'. The main area on the right shows the chat history. Each screenshot captures a different point in the conversation, with the user's prompt in a light gray bubble and the AI's response in a dark gray bubble. The AI's responses are consistently formatted with a GPT icon and a 'FO' status indicator in the top right corner.

**Screenshot 1:**

User: Responda sem dar explicações.

AI: Claro, posso fazer isso. Qual é a sua pergunta?

User: Cite qual o sinal ou sintoma, para você, é mais útil no diagnóstico da fibromialgia na prática clínica.

AI: Dor generalizada.

**Screenshot 2:**

User: Responda sem dar explicações.

AI: Claro, como posso ajudá-lo?

User: Cite os dois diagnósticos que você considera mais mimetizarem a fibromialgia.

AI: Síndrome da fadiga crônica e artrite reumatoide.

**Screenshot 3:**

User: Responda sem dar explicações.

AI: Claro, pode fazer sua pergunta.

User: Cite, se houver, o exame radiológico que você julga melhor contribuir para o diagnóstico da fibromialgia.

AI: Não há exame radiológico específico para o diagnóstico de fibromialgia.

ChatGPT

Explorar GPTs

abril

User Question Answered

Assistência à solicitação. ...

User question, model response.

User Request: Summarize Conversation

Pedido de Resumo

Title: Ajuda com Respostas

Ready for questions

Helping the user.

User Help: Title Request

User Request, Model Responds

Helpful Inquiry Support

Assistência rápida.

Ajuda com solicitação.

Assistência solicitada.

ChatGPT

Responda sem dar explicações.

Claro, como posso ajudar?

Qual o exame laboratorial você considera ter maior especificidade para o diagnóstico da fibromialgia?

Não há um exame laboratorial específico para diagnosticar fibromialgia.

ChatGPT

Explorar GPTs

abril

User Question Answered

Assistência à solicitação. ...

User question, model response.

User Request: Summarize Conversation

Pedido de Resumo

Title: Ajuda com Respostas

Ready for questions

Helping the user.

User Help: Title Request

User Request, Model Responds

Helpful Inquiry Support

Assistência rápida.

Ajuda com solicitação.

Assistência solicitada.

ChatGPT

Responda sem dar explicações.

Claro, estou pronto para responder suas perguntas de forma direta!

Considerando o tratamento farmacológico, cite sua primeira opção terapêutica para a fibromialgia.

Amitriptilina.

10
